# Supplementary material for: The expression of SIRT1 regulates the metastaticplasticity of chondrosarcoma cells by inducing epithelial-mesenchymal transition
Source: PubMed Central journal article supplement (PMC5255567; doi:10.1038/srep41203), 2017-01-23

**The expression of SIRT1 regulates the metastatic plasticity of chondrosarcoma cells by inducing epithelial-mesenchymal transition**

Helin Feng, Jin Wang, Jianfa Xu, Congcong Xie, Fulu Gao, Zhiyong Li

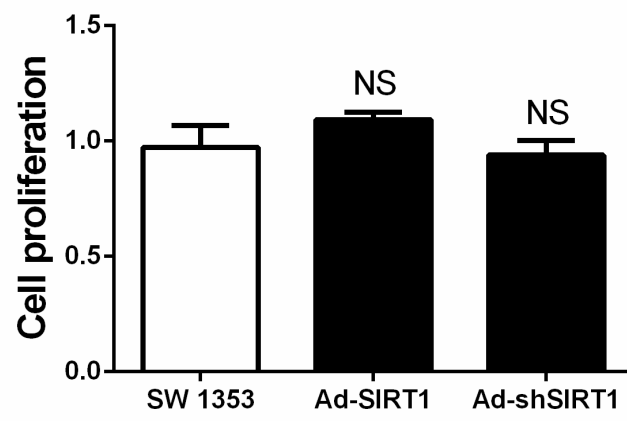

Supplement: srep41203-s1.pdf [file srep41203-s1.pdf]
